# Supplementary material for: Giant Viruses as a Source of Novel Enzymes for Biotechnological Application
Source: MDPI journal article supplement (doi:10.3390/pathogens11121453), 2022-12-01
Supplement: s1 [file s1]

**Table S2. TM-scores of *B. cereus*, Tupanvirus and PBCV-1 target sequences compared to their templates from SWISS-MODEL and/or RoseTTAFold**

| Template/<br>Target     | SWISS-MODEL     |                 |                 | RoseTTAFold     |                 |                 | RoseTTA/<br>SWISS |
|-------------------------|-----------------|-----------------|-----------------|-----------------|-----------------|-----------------|-------------------|
|                         | PDB ID:<br>6IGY | PDB ID:<br>5GQB | PDB ID:<br>6BT9 | PDB ID:<br>6IGY | PDB ID:<br>5GQB | PDB ID:<br>6BT9 |                   |
| <b><i>B. cereus</i></b> | 0.1324          | 0.1418          | <b>0.656</b>    | 0.1328          | 0.14            | <b>0.63</b>     | 0.9893            |
| <b>Tupanvirus</b>       | 0.1501          | <b>0.1978</b>   | 0.168           | 0.1357          | <b>0.1861</b>   | 0.181           | 0.7283            |
| <b>PBCV-1</b>           | <b>0.3295</b>   | 0.1557          | 0.1805          | <b>0.2568</b>   | 0.1649          | 0.183           | 0.9034            |

6IGY: chitinase B *Aspergillus niger*; 5GQB: chitinase H *Ostrinia furnacalis*; 6BT9: chitinase *Bacillus thuringiensis*; TM-scores > 0.17: not randomly chosen unrelated proteins; TM-scores > 0.5: in about the same fold in protein structures. Selected best hit (scored) models/templates were highlighted in bold.
